# Supplementary material
Source: Springer Nature journal article supplement (https://www.springermedizin.de/resource/supplementary/13643_2013_147_MOESM1_ESM.pdf/9681604)
Supplement: MOESM1 [file 9681604]

## **Additional file 1: Search Strategy**

### **MEDLINE Search Strategy (adapted for other databases as needed)**

#### **Terms:**

- 1 birth\* (ts)
- 2 gestation\* (ts)
- 3 health\* (ts)
- 4 well-being (ts )
- 5 wellbeing (ts)
- 6 disease\* (ts)
- 7 illness\* (ts)
- 8 BMI (ts)
- 9 “body mass index” (ts)
- 10 WHR (ts)
- 11 “waist hip ratio (ts)
- 12 anthropometric\* (ts)
- 13 “blood pressure” (ts)
- 14 hypertension (ts)
- 15 cardiovascular (ts)
- 16 overweight (ts)
- 17 obes\* (ts)
- 18 depressi\* (ts)
- 19 anxi\* (ts)
- 20 distress (ts)
- 21 stress (ts)
- 22 suicid\* (ts)
- 23 sleep\* (ts)
- 24 (social\* OR behav\* OR emotio\* OR develop\* OR psych\*) (AB) AND (difficul\* OR problem\* OR delay\* OR adjust\*) (ts)
- 25 self-esteem (ts)
- 26 “self esteem” (ts)
- 27 “life satisfaction” (ts B)

- 28 “quality of life” (ts B)
- 29 resilien\* (ts)
- 30 alcohol (ts)
- 31 tobacco (ts)
- 32 smok\* (ts)
- 33 “substance use” (ts)
- 34 drug\* (ts)
- 35 health (ts) AND (care OR service\* OR clinic\*) (ts)
- 36 Diseases (MESH)
- 37 Psychiatry (MESH)
- 38 Psychology (MESH)
- 39 1 - 38 (OR)**
- 40 ts=(discrim\* OR bias OR prejud\* OR hostil\* OR harass\* OR bully\* OR “unfair treat\*”  
OR oppress\*) OR mh=prejudice
- 41 ts=(rac\* OR ethnic\* OR cultur\* OR religio\* OR migra\* OR immigra\* OR refugee\*) OR  
mh=ethnic groups OR mh= minority groups
- 42 ts=(longit\* OR cohort\* OR trial\* OR “follow up” OR prospective OR retrospective OR  
“cross section\*” OR cross-section\* OR intervention\* or quantitative or survey\* OR “case-  
control” or “case control” or “randomised control\* trial\*” or “randomized control\* trial\*”  
or ”before and after” or “interrupted time series” or questionnaire\* or registr\* OR evaluat\*  
or audit\*) OR mh=Longitudinal Studies OR mh=Epidemiologic Research Design OR  
mh=Epidemiologic Study Characteristics as Topic or mh=registries
- 43 **39 AND 40 AND 41 AND 42**
